# Supplementary material for: Compositional Variations between Adult and Infant Skin Microbiome: An Update
Source: MDPI journal article supplement (doi:10.3390/microorganisms11061484), 2023-06-02
Supplement: s1 [file s1]

## SUPPLEMENTARY TABLES

**Supplementary Table S1: QIIME2 Software Parameters**

| Software Parameter                        | Value         |
|-------------------------------------------|---------------|
| FastQC filtering min gc percentage        | 25            |
| FastQC filtering max gc percentage        | 75            |
| FastQC filtering min average base quality | 20            |
| DADA2 forward read trim position          | 21            |
| DADA2 reverse read trim position          | 19            |
| DADA2 forward read truncation position    | No truncation |
| DADA2 reverse read truncation position    | No truncation |
| BLAST+ penalty                            | -5            |
| BLAST+ reward                             | 4             |
| BLAST+ gapopen                            | 5             |
| BLAST+ gapextend                          | 5             |

**Supplementary Table S2: Software Versions**

| Software     | Version       |
|--------------|---------------|
| FastQC:      | v0.11.5       |
| MultiQC      | 1.7           |
| QIIME2       | 2019.4        |
| DADA2        | QIIME2 2019.1 |
| BLAST+       | 2.6.0+        |
| scikit-learn | QIIME2 2019.1 |
| Picrust2     | 2.3.0_b       |

**Supplementary Table S3:** Species level taxa utilised for network analysis

| <b>Taxon No.</b> | <b>Taxon Classification</b>         | <b>Taxon No.</b> | <b>Taxon Classification</b>                         | <b>Taxon No.</b> | <b>Taxon Classification</b>                                    |
|------------------|-------------------------------------|------------------|-----------------------------------------------------|------------------|----------------------------------------------------------------|
| 1                | <i>Abiotrophia defectiva</i>        | 46               | <i>Gemella sanguinis</i>                            | 91               | <i>Rothia aerea</i>                                            |
| 2                | <i>Acinetobacter baumannii</i>      | 47               | <i>Granulicatella adiacens</i>   <i>paradiacens</i> | 92               | <i>Rothia mucilaginosa</i>                                     |
| 3                | <i>Acinetobacter haemolyticus</i>   | 48               | <i>Granulicatella elegans</i>                       | 93               | <i>Schaalia odontolytica</i>                                   |
| 4                | <i>Acinetobacter radioresistens</i> | 49               | <i>Haemophilus parainfluenzae</i>                   | 94               | <i>Staphylococcus aureus</i>                                   |
| 5                | <i>Acinetobacter A58</i>            | 50               | <i>Haemophilus sp_908</i>                           | 95               | <i>Staphylococcus capitis</i>                                  |
| 6                | <i>Acinetobacter DR1</i>            | 51               | <i>Janthinobacterium sp_SY12</i>                    | 96               | <i>Staphylococcus epidermidis</i>                              |
| 7                | <i>Actinomyces graevenitzii</i>     | 52               | <i>Kocuria rhizophila</i>                           | 97               | <i>Staphylococcus haemolyticus</i>                             |
| 8                | <i>Actinomyces sp_172</i>           | 53               | <i>Kytococcus sedentarius</i>                       | 98               | <i>Staphylococcus hominis</i>                                  |
| 9                | <i>Actinomyces sp_180</i>           | 54               | <i>Lactobacillus crispatus</i>                      | 99               | <i>Staphylococcus pasteurii</i>   <i>warneri</i>               |
| 10               | <i>Actinomyces sp_181</i>           | 55               | <i>Lactobacillus iners</i>                          | 100              | <i>Staphylococcus saprophyticus</i>                            |
| 11               | <i>Actinomycetales sp_C05</i>       | 56               | <i>Lactobacillus jensenii</i>                       | 101              | <i>Staphylococcus saprophyticus</i>                            |
| 12               | <i>Aeromonas hydrophila</i>         | 57               | <i>Lactococcus lactis</i>                           | 102              | <i>Streptococcus anginosus</i>                                 |
| 13               | <i>Alloprevotella sp_473</i>        | 58               | <i>Lautropia mirabilis</i>                          | 103              | <i>Streptococcus australis</i>                                 |
| 14               | <i>Anaerococcus hydrogenalis</i>    | 59               | <i>Leptotrichia sp_215</i>                          | 104              | <i>Streptococcus dentisani</i>   <i>mitis</i>                  |
| 15               | <i>Anaerococcus octavius</i>        | 60               | <i>Macrococcus caseolyticus</i>                     | 105              | <i>Streptococcus dentisani</i>   <i>mitis</i>   <i>peroris</i> |
| 16               | <i>Atopobium parvulum</i>           | 61               | <i>Micrococcus luteus</i>                           | 106              | <i>Streptococcus gordonii</i>                                  |
| 17               | <i>Atopobium vaginae</i>            | 62               | <i>Micrococcus luteus_Oral_Taxon_C78</i>            | 107              | <i>Streptococcus infantis</i>                                  |
| 18               | <i>Bergeyella sp_H70</i>            | 63               | <i>Micrococcus luteus_Oral_Taxon_H68</i>            | 108              | <i>Streptococcus lactarius</i>                                 |
| 19               | <i>Brachybacterium sp_D23</i>       | 64               | <i>Micrococcus sp_Oral_Taxon_B64</i>                | 109              | <i>Streptococcus mitis</i>                                     |
| 20               | <i>Brevundimonas diminuta</i>       | 65               | <i>Micrococcus sp_Oral_Taxon_F54</i>                | 110              | <i>Streptococcus mitis sp_C300</i>                             |
| 21               | <i>Campylobacter ureolyticus</i>    | 66               | <i>Moraxella osloensis</i>                          | 111              | <i>Streptococcus mitis sp_M334</i>                             |
| 22               | <i>Capnocytophaga leadbetteri</i>   | 67               | <i>Neisseria cinerea</i>   <i>meningitidis</i>      | 112              | <i>Streptococcus oralis</i>                                    |
| 23               | <i>Capnocytophaga sputigena</i>     | 68               | <i>Neisseria elongata</i>                           | 113              | <i>Streptococcus parasanguinis_II</i>                          |
| 24               | <i>Corynebacterium accolens</i>     | 69               | <i>Neisseria flavescens</i>   <i>subflava</i>       | 114              | <i>Streptococcus parasanguinis</i>                             |
| 25               | <i>Corynebacterium amycolatum</i>   | 70               | <i>Neisseria mucosa</i>                             | 115              | <i>Streptococcus peroris</i>                                   |

|    |                                                       |    |                                                  |     |                                                                  |
|----|-------------------------------------------------------|----|--------------------------------------------------|-----|------------------------------------------------------------------|
| 26 | <i>Corynebacterium aurimucosum</i>                    | 71 | <i>Pantoea ananatis</i>                          | 116 | <i>Streptococcus salivarius</i>                                  |
| 27 | <i>Corynebacterium genitalium</i>                     | 72 | <i>Peptoniphilus harei</i>                       | 117 | <i>Streptococcus sanguinis</i>                                   |
| 28 | <i>Corynebacterium jeikeium</i>                       | 73 | <i>Peptoniphilus lacrimalis</i><br><i>sp_836</i> | 118 | <i>Streptococcus sp_061</i>                                      |
| 29 | <i>Corynebacterium kroppenstedtii</i>                 | 74 | <i>Peptoniphilus sp_A87</i>                      | 119 | <i>Streptococcus sp_064</i>                                      |
| 30 | <i>Corynebacterium lipophiloflavum</i>                | 75 | <i>Peptostreptococcus anaerobius</i>             | 120 | <i>Streptococcus sp_074</i>                                      |
| 31 | <i>Corynebacterium mucifaciens</i>                    | 76 | <i>Porphyromonas pasteri</i>                     | 121 | <i>Streptococcus sp_423</i>                                      |
| 32 | <i>Corynebacterium pseudogenitalium</i>               | 77 | <i>Porphyromonas sp_930</i>                      | 122 | <i>Streptococcus sp_C150</i>                                     |
| 33 | <i>Corynebacterium sp_B71</i>                         | 78 | <i>Prevotella bivia</i>                          | 123 | <i>Streptococcus sp_C300</i>                                     |
| 34 | <i>Corynebacterium sundsvallense</i>                  | 79 | <i>Prevotella corporis</i>                       | 124 | <i>Streptococcus thermophilus</i>                                |
| 35 | <i>Corynebacterium tuscaniae</i>   <i>tuscaniense</i> | 80 | <i>Prevotella disiens</i>                        | 125 | <i>unresolved genus</i>                                          |
| 36 | <i>Cutibacterium acnes</i>                            | 81 | <i>Prevotella histicola</i>                      | 126 | <i>unresolved genus</i>                                          |
| 37 | <i>Cutibacterium granulosum</i>                       | 82 | <i>Prevotella melaninogenica</i>                 | 127 | <i>Veillonella atypica</i>                                       |
| 38 | <i>Dermacoccus sp_Ellin185</i>                        | 83 | <i>Prevotella nanceiensis</i>                    | 128 | <i>Veillonella denticariosi</i>   <i>dispar</i>   <i>parvula</i> |
| 39 | <i>Dialister micraerophilus</i>                       | 84 | <i>Prevotella timonensis</i>                     | 129 | <i>Veillonella dispar</i>   <i>parvula</i>                       |
| 40 | <i>Dietzia cinnamea</i>                               | 85 | <i>Propionibacterium sp_193</i>                  | 130 | <i>Veillonella sp_780</i>                                        |
| 41 | <i>Enhydrobacter aerosaccus</i>                       | 86 | <i>Pseudomonas antarctica</i>                    |     |                                                                  |
| 42 | <i>Finegoldia magna</i>                               | 87 | <i>Pseudomonas gingeri</i>                       |     |                                                                  |
| 43 | <i>Fusobacterium nucleatum</i>                        | 88 | <i>Pseudomonas putida</i>                        |     |                                                                  |
| 44 | <i>Fusobacterium periodonticum</i>                    | 89 | <i>Psychrobacter sp_cryopeg55</i>                |     |                                                                  |
| 45 | <i>Gemella haemolysans</i>                            | 90 | <i>Roseomonas mucosa</i>                         |     |                                                                  |
